1 **Air mass source determines airborne microbial diversity at the ocean-**  
2 **atmosphere interface of the Great Barrier Reef marine ecosystem**

3 Stephen D.J. Archer<sup>1,2#</sup>, Kevin C Lee<sup>2#</sup>, Katie King-Miaow<sup>2</sup>, Tancredi Caruso<sup>3</sup>, Mike  
4 Harvey<sup>4</sup>, Stephen Brian Pointing<sup>1,5,6</sup>

5 *<sup>1</sup> Yale-NUS College, National University of Singapore, Singapore 138527*

6 *<sup>2</sup>Institute for Applied Ecology New Zealand, Auckland University of Technology, Auckland*  
7 *1142, New Zealand*

8 *<sup>3</sup> School of Biological Sciences and Institute for Global Food Security, Queen's University*  
9 *Belfast, Belfast BT9 7BL, Northern Ireland, UK*

10 *<sup>4</sup> National Institute of Water and Atmospheric Research (NIWA), Wellington 6021, New*  
11 *Zealand*

12 *<sup>5</sup> Department of Biological Sciences, National University of Singapore, Singapore 117558*

13 *<sup>6</sup> Institute of Nature and Environmental Technology, Kanazawa University, Kanazawa*  
14 *920-1151, Japan*

15 # These authors contributed equally.

16

17 Running title: Airborne microbial diversity above Great Barrier Reef

18

19 Keywords: aerobiology, bio-aerosol, coral symbionts, Great Barrier Reef, marine  
20 microbiology, microbial biogeography.

21

1 **Abstract**

2 The aerosphere is the least understood biome on Earth despite its critical role as a  
3 microbial transport medium. The influence of surface cover on composition of airborne  
4 microbial communities above marine systems is unclear. Here we report evidence for a  
5 dynamic microbial presence at the ocean-atmosphere interface of a major marine  
6 ecosystem, the Great Barrier Reef, and identify that an oceanic or continental trajectory  
7 for aerosols correlates with observed shifts in bacterial and fungal diversity. A putative  
8 airborne source for coral symbionts and pathogens was also demonstrated thus  
9 highlighting biological connectivity between atmosphere and ocean.

10

11 **Main text**

12 Airborne microbial transport is central to dispersal outcomes [1] and several studies  
13 have demonstrated diverse microbial biosignatures are recoverable from the  
14 aerosphere. Microbial transport has been shown to occur across inter-continental  
15 distances above terrestrial habitats [2–4]. Variation has been recorded seasonally [5, 6],  
16 with underlying land use [7], and due to stochastic weather events such as dust storms  
17 [8]. Above marine systems abundance of recoverable microorganisms decreases  
18 exponentially with distance from land [9] and relatively little is known about potential  
19 biogeography of airborne microorganisms above the oceans. Some studies have shown  
20 that aerosolization of marine microorganisms to the aerosphere is an important  
21 process, e.g. [10], but the reverse deposition of airborne taxa to the ocean is poorly  
22 understood. This deposition is, however, a potential source of marine pathogens [11]  
23 and symbionts which are crucial to the health of coral reefs [12]. Here we test the  
24 hypothesis that persistent microbial inputs to the ocean-atmosphere interface of the

1 Great Barrier Reef ecosystem vary according to surface cover during transit of the air-  
2 mass and that an atmospheric source of putative coral-associated microbial taxa occurs.

3 The Great Barrier Reef is an ideal model system for research on bio-aerosols  
4 because incoming air mass during the average residence time for microorganisms in air  
5 [13] arises from two distinct sources: a terrestrial continental source in Australia  
6 transported across east and northeast dust paths and an oceanic source in the Coral Sea  
7 (Fig. 1a). Our study took advantage of a persistent flat-calm sea state during September-  
8 October 2016 that minimised interference from microorganisms that are aerosolised by  
9 marine spray in heavier sea states at the Great Barrier Reef [14]. We recovered massive  
10 bulk-phase air samples 25m above sea level using a high-volume liquid impinger  
11 apparatus (Coriolis  $\mu$ , Bertin Technologies, France) [15] during a voyage of the *RV*  
12 *Investigator* to circumnavigate the reef and recovered approximately 3,000m<sup>3</sup> air  
13 during daily from which environmental DNA was recovered (n = 53) [15]  
14 (Supplementary Information, Supplementary Methods). We used the National Oceanic  
15 and Atmospheric Administration (NOAA) HYSPLIT-WEB model  
16 (<https://ready.arl.noaa.gov/HYSPLIT.php>) to identify back trajectories of air mass  
17 during the average residence time for microbial cells in air [13] and this could be  
18 delineated very clearly into those with recent transit over continental or oceanic  
19 surfaces (Fig. 1a). The concurrent concentration of atmospheric radon gas measured in  
20 real time was higher from back trajectories originating over continental Australia  
21 compared with those that originated from the ocean (Mann-Whitney U Test, P = 0.003)  
22 thus further verifying the binning of air mass into a continental or oceanic origin. High-  
23 throughput sequencing of the bacterial 16S rRNA gene and fungal Internal Transcribed  
24 Spacer region loci were performed as previously described [15] and phylogenetic  
25 analysis of amplicon sequence variants (ASVs) were used to estimate diversity [16]

1 (Supplementary Information, Supplementary Methods). Sequencing of control samples  
2 revealed very low recovery of putative contaminant microbial signatures, a total of only  
3 17 out of 1403 bacterial and 5 out of 3775 fungal sequences were statistically classified  
4 as putative contaminants (Supplementary Information, Supplementary Methods). With  
5 few exceptions all samples were sequenced to asymptote thus allowing meaningful  
6 ecological inference from these data (Supplementary Information Fig. 1a).

7 All air samples supported ultra-low biomass as inferred indirectly from DNA  
8 yield (mean recovery 0.23 ng/m<sup>3</sup>, SD 0.21 ng/m<sup>3</sup>) with no significant difference  
9 between sample groups (Mann-Whitney U Test, P = 0.37). Terrestrial or oceanic transit  
10 significantly determined bacterial community structure at the ocean-atmosphere  
11 interface above the great Barrier Reef (P = 0.001). In terms of overall taxa richness,  
12 bacteria displayed similar richness in terrestrial and ocean-derived samples whereas  
13 fungi were markedly more speciose in continent-derived samples (Supplementary  
14 Information, Fig. S1b).

15 We interrogated the phylogenetic diversity of terrestrial and marine-sourced air  
16 by generating heatmaps of distribution for the 100 most abundant taxa. This analysis  
17 captured 98.4% bacterial and 66.9% fungal overall diversity in the libraries. Clear  
18 taxonomic differences in bacterial (Fig. 1b) and fungal (Fig. 1c) assemblages between  
19 ocean and continent-derived air mass occurred. The robust nature of these data was  
20 further highlighted by the lack of recoverable taxa in experimental controls  
21 (Supplementary Information, Fig. S2) and this is particularly important for  
22 interrogation of low biomass environments such as the aerosphere. Overall the number  
23 of shared bacterial taxa was high amongst samples derived from ocean (87.9%) and  
24 terrestrial (89.6%) sources. Fungi displayed fewer shared taxa between ocean (64.9%)  
25 and continental (69.1%) sources. Nonetheless a high number of taxa specific to either

1 ocean (538 bacteria, 1,335 fungi) or continental (395 bacteria, 1,810 fungi) aerosols  
2 were recorded (Figs. 1b, 1c). We screened bacterial taxa from our sequence libraries at  
3 genus level to known coral-associated taxa including symbionts and pathogens  
4 (Supplementary Information, Supplementary Methods) [17]. The ocean derived air  
5 mass supported 8.4% putative coral associates whilst for continental sources this value  
6 was lower at 2.9% (Supplementary Information, Table S1). There were few fungal  
7 sequences with which to make comparisons but at the genus level there were 8.7% of  
8 ocean samples and 6.2% continental taxa that have been recorded as coral associates  
9 (Supplementary Information, Table S2). The most differentially abundant ASV from our  
10 study (*Ralstonia* sp.) showed high similarity to a previously identified coral  
11 endosymbiont (Supplementary Information, Table S3).

12 Shifts in relative abundance of bacteria mainly occurred within the Phylum  
13 Proteobacteria and followed a temporal pattern during the voyage where the dominant  
14 genus *Alistipes* was gradually replaced by *Bradyrhizobium* and *Ralstonia*, and then in  
15 turn by *Acinetobacter* (Fig. 2a, Supplementary Information, Fig. S3). All have been  
16 recovered as isolates or environmental rRNA gene sequences from both marine and  
17 terrestrial sources, thus making any attempt at source tracking challenging. For the  
18 Fungi terrestrial air sources supported higher diversity than marine sources and this  
19 reflected the large number of taxa associated with terrestrial habitats. A striking  
20 observation was that 56% of recovered genera supported yeast-like taxa, and this  
21 provides support for a marine origin of aerosols since oceanic waters are thought to  
22 support elevated abundance of yeasts over filamentous fungi [18]. Shifts in diversity  
23 were less pronounced overall for the Fungi (Fig. 2b, Supplementary Information, Fig.  
24 S4), and were partially obscured by the high diversity relative to Bacteria at the genus  
25 level. Major shifts in relative abundance occurred for *Aureobasidium*, *Cladosporium*,

1 *Coprinopsis*, *Rhodospiridiobolus* and *Rhodotorula*, and all of these genera have known  
2 terrestrial and marine records, although it should be noted that terrestrial fungal spores  
3 have been recorded in many marine microbial diversity assessments but are unlikely to  
4 be active components of an ocean surface water microbiome.

5 We further interrogated the phylogenetic diversity of terrestrial and marine-  
6 sourced air using Net Relatedness Index (NRI) analysis to estimate the level of  
7 phylogenetic structuring and putative recruitment from local and regional pools [15].  
8 The NRI analysis revealed that bacterial assemblages from both continental and marine  
9 origin displayed positive NRI values with effect sizes indicative of non-random  
10 assembly. Communities were thus phylogenetically highly structured, which is possibly  
11 due to environmental filtering of traits during transit over the different surface covers  
12 (Supplementary Information Fig. S5). The fungi from continental sources displayed a  
13 similar though more variable trend of phylogenetic structuring although in ocean-  
14 derived samples this clustering was relatively weak indicating they were more  
15 randomly assembled (Supplementary Information Fig. S5). When considered in tandem  
16 with our low diversity estimates for fungi in ocean derived samples these findings  
17 suggest that fungi are severely depleted in marine aerosols. Community phylogenetics  
18 and all our analyses support the hypothesis that long-range transport of microbial taxa  
19 in air results in selection during transit over different surface covers [15, 19, 20].

20 Overall our findings demonstrate that the aerosphere provides connectivity  
21 between the Great Barrier Reef marine ecosystem and exogenous microbial input from  
22 terrestrial and marine sources. This may be important to coral symbioses and also to  
23 pathogen input via persistent airborne deposition. Our study provided a unique insight  
24 on variability of airborne microbial inputs to the largest coral reef ecosystem on Earth.

25

1 **Data availability**

2 All sequence data generated by this study has been submitted to the EMBL European  
3 Nucleotide Archive (ENL) under BioProject PRJEB31630 with sample accession  
4 numbers ERS3215240 to ERS3215312.

5  
6 **Author contribution statement**

7 S.D.J.A, K.C.L, T.C., M.H. and S.B.P. conceived the study; S.D.J.A. conducted ship-board  
8 fieldwork; S.D.J.A and K.C.L. performed laboratory experiments; S.D.J.A., K.C.L., T.C., K.K-  
9 M. and S.B.P. performed data analysis; S.D.J.A, K.C.L, T.C., K.K-M., M.H. and S.B.P. analysed  
10 and interpreted the findings; S.B.P. wrote the manuscript.

11  
12 **Materials & Correspondence**

13 Correspondence and requests for materials should be addressed to S.B.P. Email:  
14 [stephen.pointing@yale-nus.edu.sg](mailto:stephen.pointing@yale-nus.edu.sg).

15  
16 **Acknowledgements**

17 Collaboration in this work was supported through ARC Discovery Project (grant  
18 number DP150101649) and NIWA's Research Programme in Ocean-Climate  
19 Interactions (grant number 2017/18 SCI). Financial support for laboratory research  
20 was provided by the Yale-NUS College Start-up Fund. Author SDJA was supported by a  
21 Postdoctoral Fellowship from Auckland University of Technology (AUT). We thank ARC  
22 Discovery Project Principal Investigators Prof. Zoran Ristovski and Luke Cravigan  
23 (Queensland University of Technology), the officers and crew of the RV Investigator  
24 (IN2016\_V05), and Tony Bromley and Sally Gray (NIWA) for their outstanding logistical  
25 support and Timothy Lawrence (AUT) for his DNA sequencing support. Radon data was

1 provided by Scott Chambers and Alastair Williams (Australian Nuclear Science and  
2 Technology Organisation).

3

#### 4 **Conflict of Interest**

5 The authors declare no competing interests.

6

#### 7 **References**

- 8 1. Hanson CA, Fuhrman JA, Horner-Devine MC, Martiny JBH. Beyond biogeographic  
9 patterns: processes shaping the microbial landscape. *Nat Rev Microbiol* 2012; **10**:  
10 497–506.
- 11 2. Barberán A, Henley J, Fierer N, Casamayor EO. Structure, inter-annual recurrence,  
12 and global-scale connectivity of airborne microbial communities. *Sci Total*  
13 *Environ* 2014; **487**: 187–195.
- 14 3. Spracklen D V., Heald CL. The contribution of fungal spores and bacteria to  
15 regional and global aerosol number and ice nucleation immersion freezing rates.  
16 *Atmos Chem Phys* 2014; **14**: 9051–9059.
- 17 4. Caliz J, Triadó-Margarit X, Camarero L, Casamayor EO. A long-term survey unveils  
18 consistent seasonal trends in the airborne microbiome composition coupled to air  
19 masses circulation. *Proc Natl Acad Sci* 2019; **115**: 12229–12234.
- 20 5. Woo AC, Brar MS, Chan Y, Lau MCY, Leung FCC, Scott JA, et al. Temporal variation  
21 in airborne microbial populations and microbially-derived allergens in a tropical  
22 urban landscape. *Atmos Environ* 2013; **74**: 291–300.
- 23 6. Bowers RM, McCubbin IB, Hallar AG, Fierer N. Seasonal variability in airborne  
24 bacterial communities at a high-elevation site. *Atmos Environ* 2012; **50**: 41–49.
- 25 7. Bowers R, McLetchie S, Knight R, Fierer N. Spatial variability in airborne bacterial



- 1 communities across land-use types and their relationship to the bacterial  
2 communities of potential source environments. *ISME J* 2011; **5**: 601–612.
- 3 8. Favet J, Lapanje A, Giongo A, Kennedy S, Aung Y-Y, Cattaneo A, et al. Microbial  
4 hitchhikers on intercontinental dust: catching a lift in Chad. *ISME J* 2013; **7**: 850–  
5 67.
- 6 9. Mayol E, Arrieta JM, Jiménez MA, Martínez-Asensio A, Garcias-Bonet N, Dachs J, et  
7 al. Long-range transport of airborne microbes over the global tropical and  
8 subtropical ocean. *Nat Commun* 2017; **8**: 201.
- 9 10. Aller JY, Kuznetsova MR, Jahns CJ, Kemp PF. The sea surface microlayer as a  
10 source of viral and bacterial enrichment in marine aerosols. *J Aerosol Sci* 2005;  
11 **36**: 801–812.
- 12 11. Weir-Brush JR, Garrison VH, Smith GW, Shinn EA. The Relationship Between  
13 Gorgonian Coral (Cnidaria: Gorgonacea) Diseases and African Dust Storms.  
14 *Aerobiologia (Bologna)* 2004; **20**: 119–126.
- 15 12. Rosenberg E, Koren O, Reshef L, Efrony R, Zilber-Rosenberg I. The role of  
16 microorganisms in coral health, disease and evolution. *Nat Rev Microbiol* 2007; **5**:  
17 355–362.
- 18 13. Burrows SM, Butler T, Jöckel P, Tost H, Kerkweg A, Pöschl U, et al. Bacteria in the  
19 global atmosphere – Part 2: Modeling of emissions and transport between  
20 different ecosystems. *Atmos Chem Phys* 2009; **9**: 9281–9297.
- 21 14. Cropp R, Gabric A, van Tran D, Jones G, Swan H, Butler H. Coral reef aerosol  
22 emissions in response to irradiance stress in the Great Barrier Reef, Australia.  
23 *Ambio* 2018; **47**: 671–681.
- 24 15. Archer S, Lee K, Caruso T, Lee C, Maki T, Cowan D, et al. Microbial dispersal  
25 limitation to isolated soil microbial habitats of Antarctica. *Nat Microbiol* 2019; **4**:

- 1           doi: 10.1038/s41564-019-0370-4.
- 2   16.   Callahan BJ, McMurdie PJ, Holmes SP. Exact sequence variants should replace  
3           operational taxonomic units in marker-gene data analysis. *ISME J* 2017; **11**:  
4           2639–2643.
- 5   17.   Harvell D, Jordán-Dahlgren E, Merkel S, Rosenberg E, Raymundo L, Smith G, et al.  
6           Coral disease, environmental drivers, and the balance between coral and  
7           microbial associates. *Oceanography* 2007; **20**: 172–195.
- 8   18.   Kutty SN, Philip R. Marine yeasts—a review. *Yeast* 2008; **25**: 465–483.
- 9   19.   Mayol E, Jiménez MA, Herndl GJ, Duarte CM, Arrieta JM. Resolving the abundance  
10           and air- sea fluxes of airborne microorganisms in the North Atlantic Ocean. *Front*  
11           *Microbiol* 2014; **5**: 557.
- 12   20.   Šantl-Temkiv T, Gosewinkel U, Starnawski P, Lever M, Finster K. Aeolian dispersal  
13           of bacteria in southwest Greenland: Their sources, abundance, diversity and  
14           physiological states. *FEMS Microbiol Ecol* 2018; **94**: fiy031.

15

## 16   **Figure Legends**

17   **Figure 1.** (a) HYSPLIT back trajectory analysis for modelled transit routes (3 d  
18           residence time [12]) with colours representing air mass origin over continent  
19           (green) or ocean (red) surface; (b) distribution and relative abundance for the  
20           1,000 most abundant bacterial amplicon sequence variants (ASVs), Continent n =  
21           8, Ocean n = 19; (c) distribution and relative abundance for the 1,000 most  
22           abundant fungal ASVs, Continent n = 8, Ocean n = 17.

23

24   **Figure 2.** (a) Distribution and relative abundance of the 100 most abundant bacterial  
25           amplicon sequence variants (ASVs) with genus identified, Continent n = 8, Ocean

- 1 n = 19; (b) Distribution and relative abundance of the 100 most abundant fungal
- 2 ASVs with genus identified, Continent n = 8, Ocean n = 17.

a.

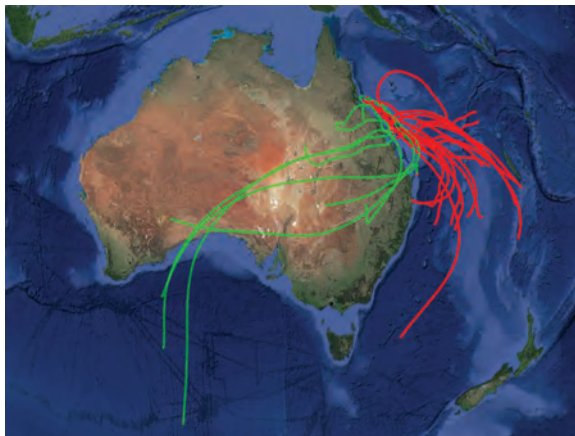

b.

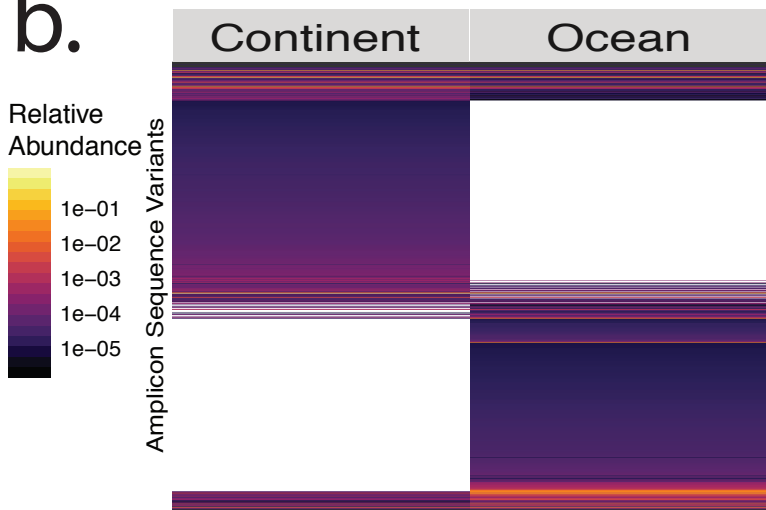

c.

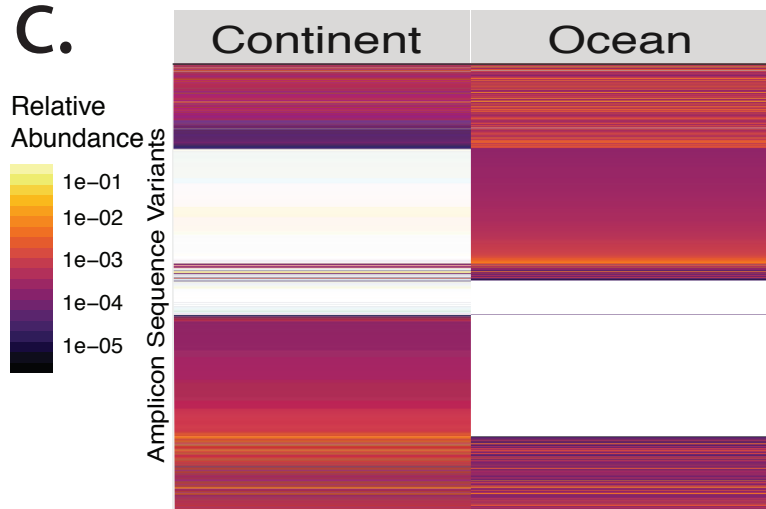

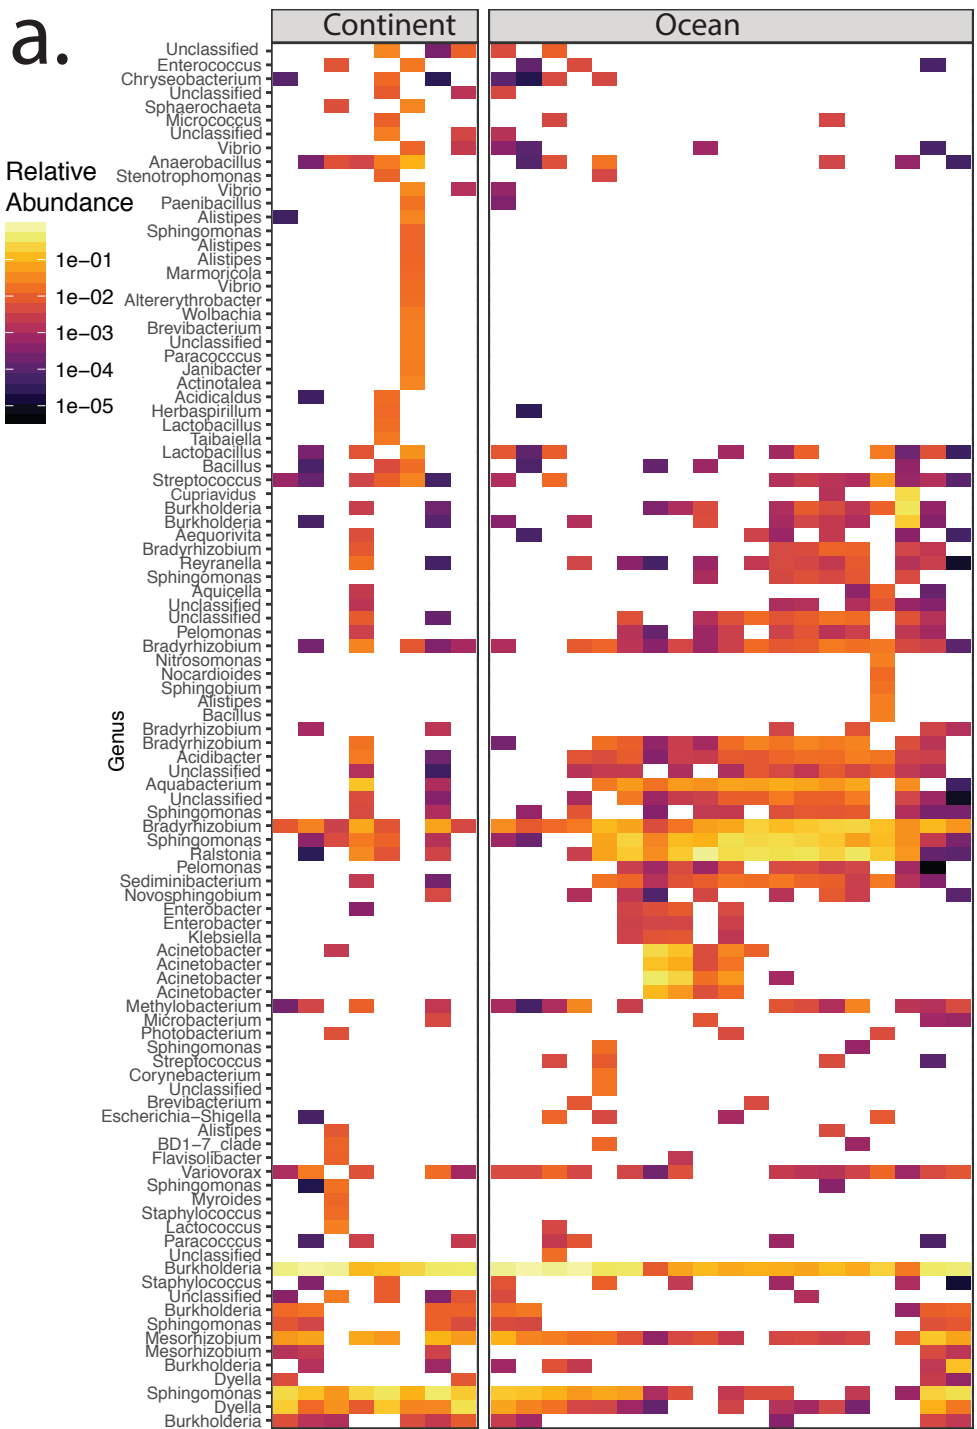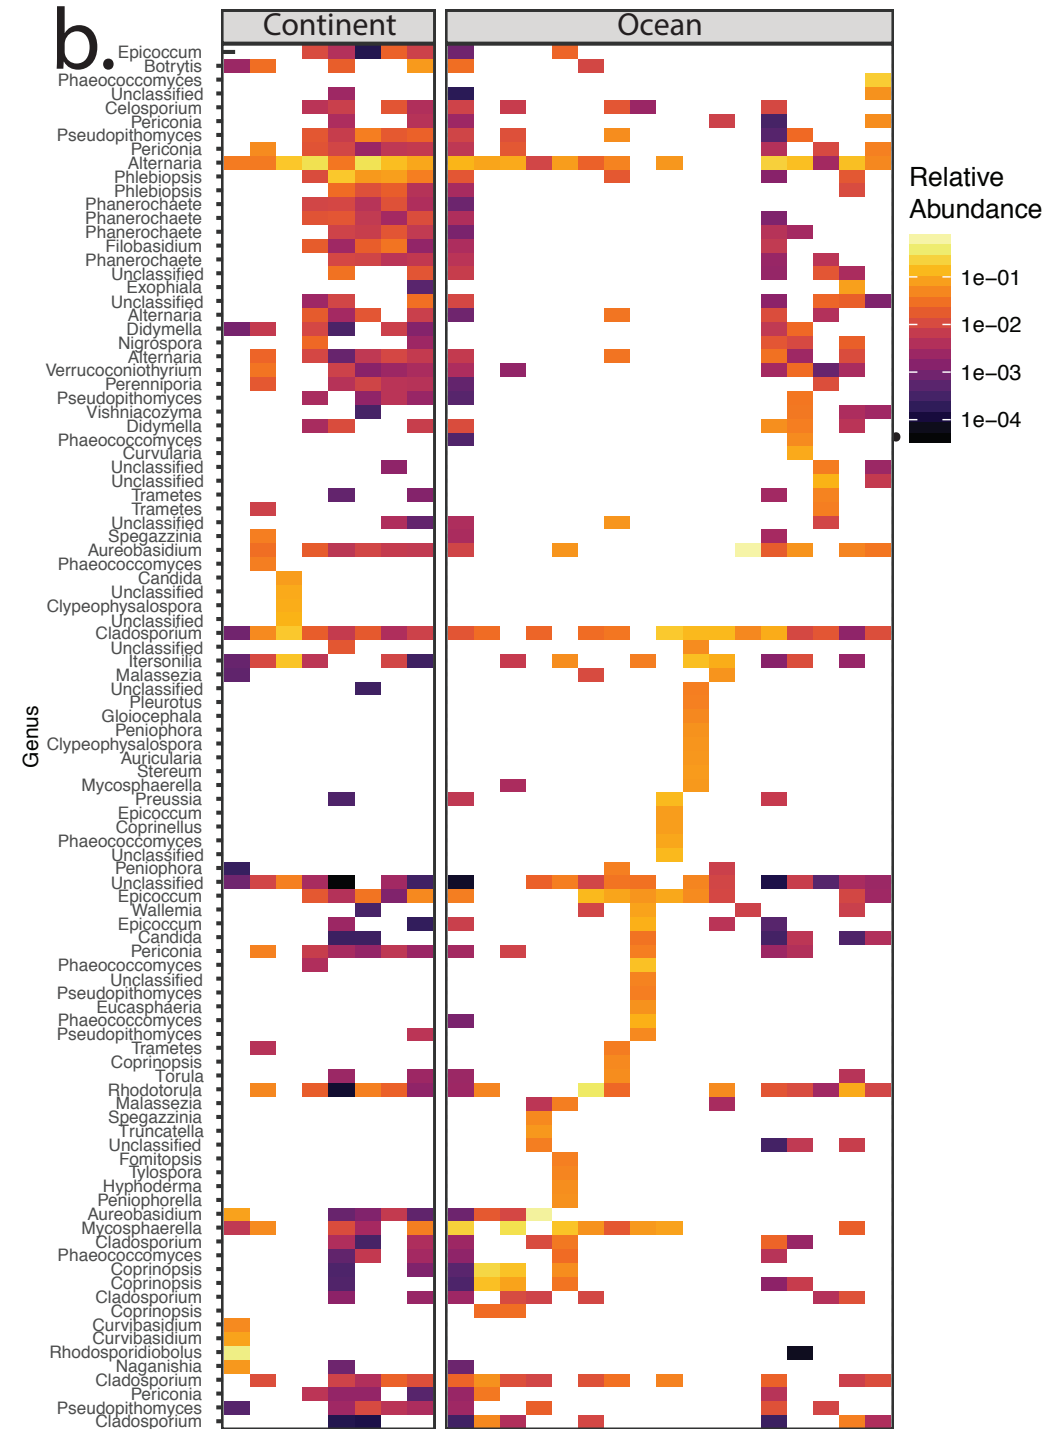

Source: https://www.biorxiv.org/content/biorxiv/early/2019/03/20/583427.full.pdf
